# Supplementary material for: Structural, morphological, and optical properties of carbon nanoparticles unsheathed from date palm fronds
Source: Royal Society of Chemistry journal article supplement (doi:10.1039/d2ra04189h), 2022-01-01
Supplement: d2ra04189h1.pdf [file d2ra04189h1.pdf]

## Supplement Information

### **™Structural, morphological, and optical properties of carbon nanoparticles unsheathed from date palm fronds**

Shaik Muhammad. U. G. Mohiuddin,<sup>a,b,\*</sup> Abdulkadir Aydarous,<sup>a</sup> Ahmed Alshahrie,<sup>a,b</sup> Abdu Saeed,<sup>a,b,c</sup> Adnan Memic,<sup>b</sup> Shittu Abdullahi,<sup>a,b,d</sup> and Numan Salah,<sup>b,\*</sup>

<sup>a</sup> Department of Physics, Faculty of Sciences, King Abdulaziz University, 21589, Jeddah, Saudi Arabia.

<sup>b</sup> Center of Nanotechnology, King Abdulaziz University, 21589, Jeddah, Saudi Arabia.

<sup>c</sup> Department of Physics, Faculty of Sciences, Thamar University, Thamar, Yemen.

<sup>d</sup> Department of Physics, Faculty of Science, Gombe State University, Gombe, Nigeria.

\*E-mails: [smohiuddin@stu.kau.edu.sa](mailto:smohiuddin@stu.kau.edu.sa) (Shaik Mohiuddin), [nsalah@kau.edu.sa](mailto:nsalah@kau.edu.sa) (Numan Salah)

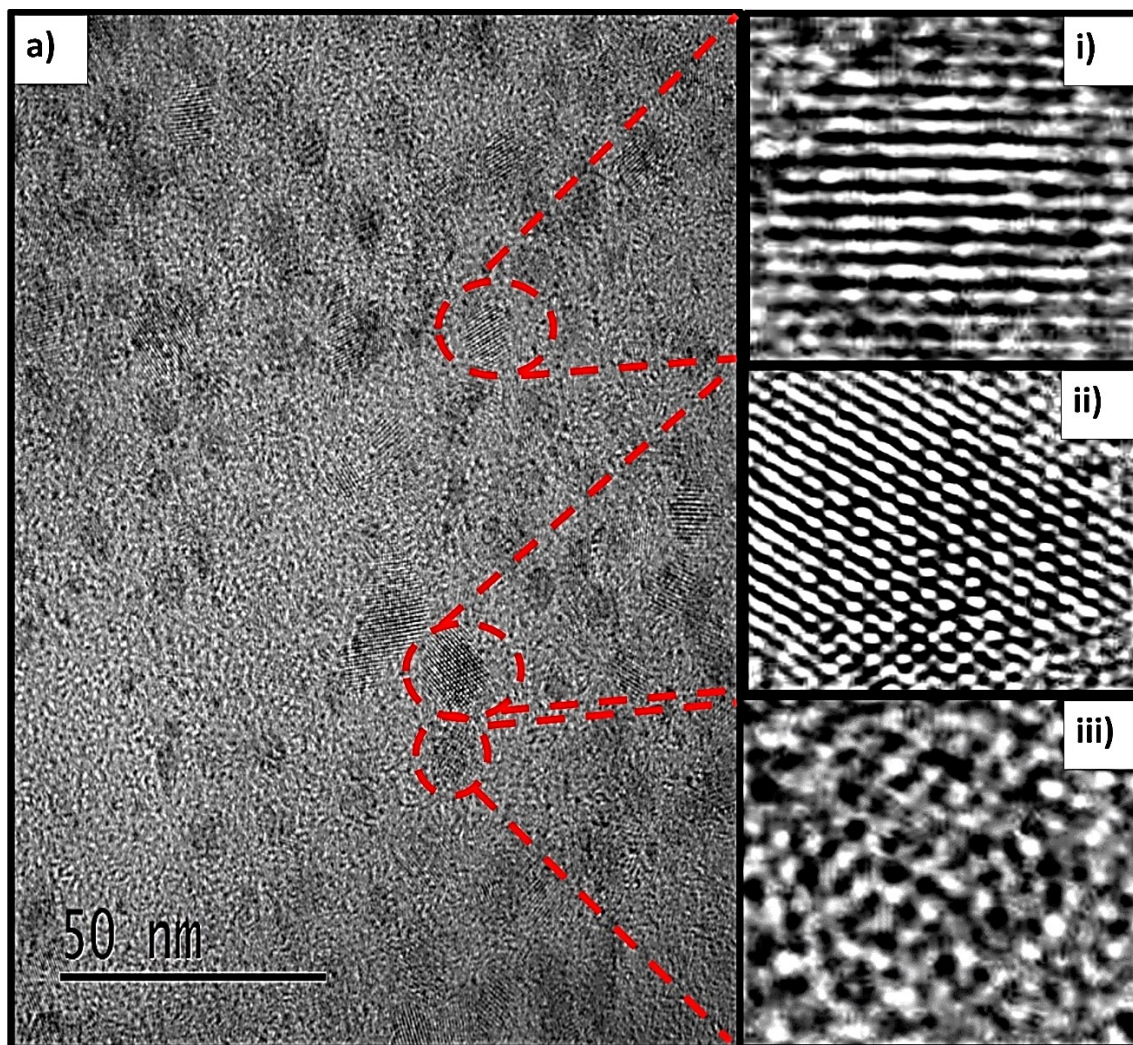

Figure. S1: The HR-TEM image of CNPs at 50 nm (a) magnification displaying the interfinger lattice (i) , crystallinity (ii) , and traces of hexagonal rings carbon (iii).

**Table S1: Summaried FTIR transmittance and vibration values of bands obtained for CNPs.**

| Transmittance (cm <sup>-1</sup> ) | Appearance           | Element group | ref          |
|-----------------------------------|----------------------|---------------|--------------|
| 3400                              | strong               | C-OH          | <b>1,2</b>   |
| 3163                              | stretching vibration | C-H           | <b>2</b>     |
| 3013                              | stretching vibration | C-H           | <b>3</b>     |
| 2900                              | stretching vibration | C-H           | <b>3,4</b>   |
| 2763                              | stretching vibration | C-H           | <b>3,4</b>   |
| 1523                              | small                | C=C           | <b>1,3-5</b> |
| 1700                              | medium               | C=O           | <b>1,3-5</b> |
| 1398                              | stretching vibration | C-O-C         | <b>3-5</b>   |
| 1131                              | stretching vibration | C-O           | <b>3-5</b>   |
| 1335                              | stretching vibration | C-O           | <b>3-5</b>   |
| 2350                              | strong               | O=C=O         | <b>6,7</b>   |

**Reference**

- 1 C. Zhu, J. Zhai and S. Dong, *Chem. Commun.*, 2012, **48**, 9367–9369.
- 2 A. M. Alam, B. Y. Park, Z. K. Ghouri, M. Park and H. Y. Kim, *Green Chem.*, 2015, **17**, 3791–3797.
- 3 B. Wang, A. Song, L. Feng, H. Ruan, H. Li, S. Dong and J. Hao, *ACS Appl. Mater. Interfaces*, 2015, **7**, 6919–6925.
- 4 A. Ambrosi, C. K. Chua, A. Bonanni and M. Pumera, *Chem. Rev.*, 2014, **114**, 7150–7188.
- 5 Z. Qian, J. Ma, X. Shan, H. Feng, L. Shao and J. Chen, *Chemistry*, 2014, **20**, 2254–2263.
- 6 P. A. Gerakines, W. A. Schutte, J. M. Greenberg and E. F. van Dishoeck, *Astron. Astrophys.*, 1995, **296** [43], 810–818.
- 7 R. Gómez-Hernández, Y. PanecatI-Bernal and M. Á. Méndez-Rojas, *Heliyon*, 2019, **5**, e02139.
